# Supplementary material for: Gabapentin and Pregabalin and Risk of Atrial Fibrillation in the Elderly: A Population-Based Cohort Study in an Electronic Prescription Database
Source: PubMed Central journal article supplement — Drug Saf. 2018 Jun 28;41(12):1325–31. doi: 10.1007/s40264-018-0695-6 (PMC6223696; doi:10.1007/s40264-018-0695-6), 2018-06-28
Supplement: 40264_2018_695_MOESM1_ESM.pdf [file 40264_2018_695_MOESM1_ESM.pdf]

# **Gabapentin and pregabalin and risk of atrial fibrillation in the elderly: A population-based cohort study in an electronic prescription database**

Drug Safety

L Ortiz de Landaluce, I.E.,<sup>1</sup> P Carbonell, Econ,<sup>1</sup> C Asensio, M.D.,<sup>2</sup> N Escoda, Pharm.D.,<sup>1</sup> P López, Pharm.D.,<sup>1</sup> J-R Laporte, M.D.<sup>2</sup>

<sup>1</sup> Gerència de Prestacions Farmacèutiques i Accés al Medicament  
Servei Català de la Salut  
Travessera de Les Corts 131-159  
Edifici Olimpia  
08028 Barcelona

<sup>2</sup> Fundació Institut Català de Farmacologia (FICF)  
HU Vall d'Hebron  
Universitat Autònoma de Barcelona  
WHO Collaborating Centre for Research & Training in Pharmacoepidemiology  
P Vall d'Hebron 119-129  
08035 Barcelona

**Correspondence:**

Prof. Joan-Ramon Laporte  
email: [jrl@icf.uab.cat](mailto:jrl@icf.uab.cat)

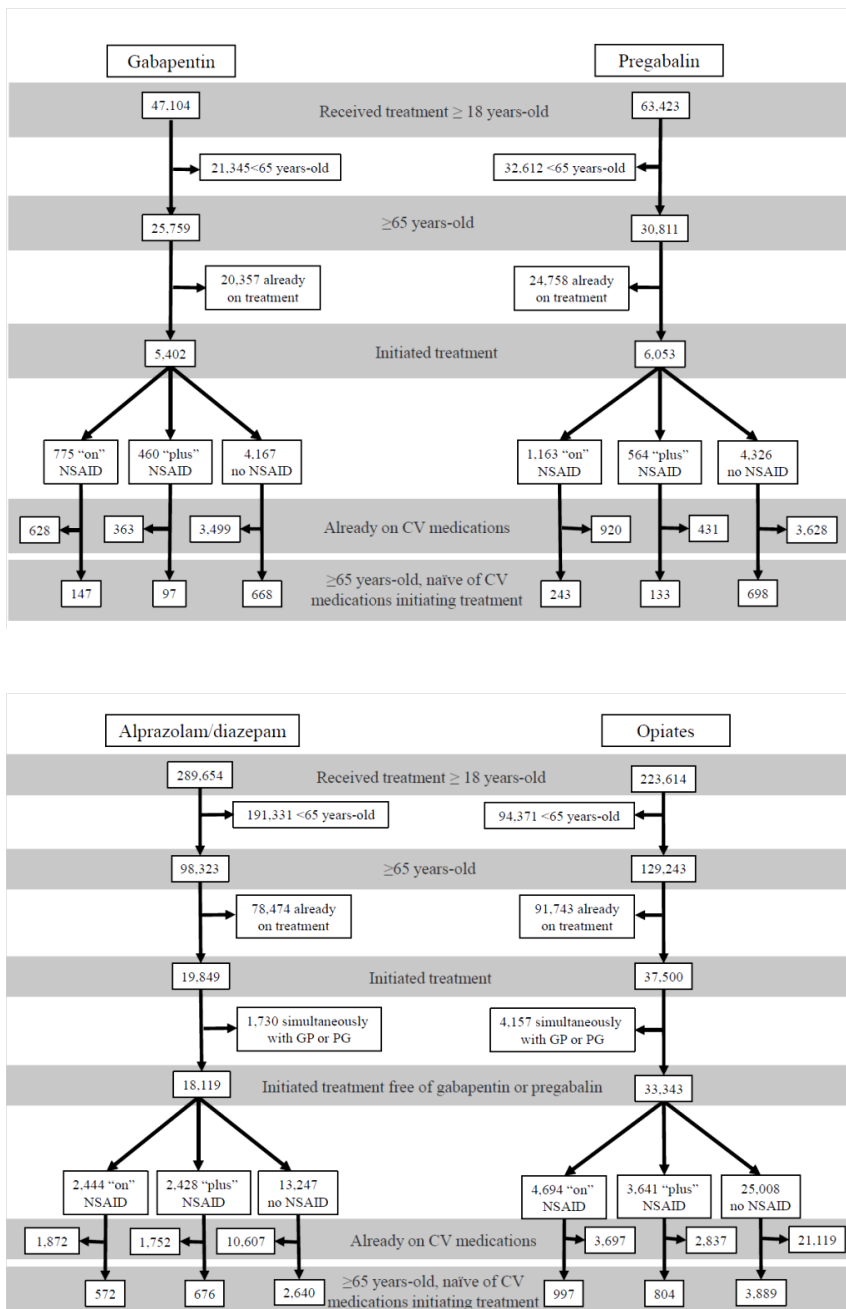

Figure S1. Patients included in the study and exclusions due to age, exposure to gabapentinoids or previous use of cardiovascular drugs in the 6 months before, and concomitant use with NSAIDs. "on" NSAID: the drug was dispensed to a patient who was already on an NSAID. "plus" NSAID: the drug of interest and the NSAID were prescribed together for first time, "no NSAID": the patient had not been on an NSAID in the 6 months before, neither at the start of treatment with the drug of interest.

Table S1. Use of drugs for atrial fibrillation (secondary variable [OAC/APA] by age and sex.

|                               | Age (years)                             |                                         |                                       | Sex                                     |                                          |
|-------------------------------|-----------------------------------------|-----------------------------------------|---------------------------------------|-----------------------------------------|------------------------------------------|
|                               | 65-74                                   | 75-84                                   | ≥84                                   | Male                                    | Female                                   |
| Compared to opiate analgesics |                                         |                                         |                                       |                                         |                                          |
| Opiates                       | 1.00 (Reference category)<br>(44/2,294) | 1.00 (Reference category)<br>(72/1,129) | 1.00 (Reference category)<br>(32/466) | 1.00 (Reference category)<br>(57/1,242) | 1.00 (Reference category)<br>(191/2,647) |
| Gabapentin                    | 2.70 (1.61–4.53)<br>(20/386)            | 2.01 (1.32–3.07)<br>(26/203)            | 2.35 (1.27–4.37)<br>(12/79)           | 2.22 (1.42–3.49)<br>(25/245)            | 2.27 (1.54–3.33)<br>(33/423)             |
| Pregabalin                    | 2.03 (1.17–3.53)<br>(17/437)            | 1.67 (1.04–2.66)<br>(20/189)            | 3.44 (1.99–5.95)<br>(16/72)           | 1.69 (1.02–2.79)<br>(19/245)            | 2.18 (1.49–3.20)<br>(34/453)             |
| GP/PG                         | 2.34 (1.52–3.60)<br>(37/823)            | 1.84 (1.29–2.62)<br>(46/392)            | 2.87 (1.79–4.61)<br>(28/151)          | 1.92 (1.31–2.80)<br>(44/490)            | 2.22 (1.64–3.02)<br>(67/876)             |
| Compared to benzodiazepines   |                                         |                                         |                                       |                                         |                                          |
| AL/DZ                         | 1.00 (Reference category)<br>(60/1,884) | 1.00 (Reference category)<br>(43/541)   | 1.00 (Reference category)<br>(25/215) | 1.00 (Reference category)<br>(52/718)   | 1.00 (Reference category)<br>(82/1,922)  |
| Gabapentin                    | 1.63 (0.91–2.67)<br>(20/386)            | 1.64 (1.03–2.60)<br>(26/203)            | 1.31 (0.69–2.47)<br>(12/79)           | 1.41 (0.89–2.22)<br>(25/245)            | 1.83 (1.24–2.70)<br>(33/423)             |
| Pregabalin                    | 1.22 (0.72–2.07)<br>(17/437)            | 1.36 (0.82–2.24)<br>(20/189)            | 1.91 (1.08–3.37)<br>(16/72)           | 1.07 (0.65–1.77)<br>(19/245)            | 1.76 (1.20–2.59)<br>(34/453)             |
| GP/PG                         | 1.41 (0.94–2.11)<br>(37/823)            | 1.50 (1.01–2.23)<br>(46/392)            | 1.59 (0.97–2.62)<br>(28/151)          | 1.22 (0.83–1.79)<br>(44/490)            | 1.79 (1.31–2.45)<br>(67/876)             |

Table S2. Use of drugs for atrial fibrillation. Secondary analysis including all patients initiating treatment with each drug of interest, independently of concomitant use of other study drugs.

|                               | OAC+AA <sup>a</sup>                     | OAC/APA+AA <sup>b</sup>                 | AA <sup>c</sup>                         | OAC/APA <sup>d</sup>                     |
|-------------------------------|-----------------------------------------|-----------------------------------------|-----------------------------------------|------------------------------------------|
| Compared to opiate analgesics |                                         |                                         |                                         |                                          |
| Opiates                       | 1.00 (Reference category)<br>(8/5,690)  | 1.00 (Reference category)<br>(14/5,690) | 1.00 (Reference category)<br>(23/5,690) | 1.00 (Reference category)<br>(196/5,690) |
| Gabapentin                    | 3.12 (0.94–10.34)<br>(4/912)            | 2.67 (1.03–6.94)<br>(6/912)             | 2.44 (1.13–5.26)<br>(9/912)             | 1.97 (1.50–2.60)<br>(62/912)             |
| Pregabalin                    | 1.99 (0.53–7.48)<br>(3/1,074)           | 2.27 (0.87–5.90)<br>(6/1,074)           | 1.61 (0.69–3.75)<br>(7/1,074)           | 1.73 (1.31–2.28)<br>(64/1,074)           |
| GP/PG <sup>e</sup>            | 2.51 (0.91–6.90)<br>(7/1,986)           | 2.46 (1.14–5.30)<br>(12/1,986)          | 1.99 (1.06–3.76)<br>(16/1,986)          | 1.48 (1.55–2.29)<br>(126/1,986)          |
| Compared to benzodiazepines   |                                         |                                         |                                         |                                          |
| AL/DZ <sup>f</sup>            | 1.00 (Reference category)<br>(10/3,888) | 1.00 (Reference category)<br>(12/3,888) | 1.00 (Reference category)<br>(13/3,888) | 1.00 (Reference category)<br>(134/3,888) |
| Gabapentin                    | 3.11 ((0.94–10.32)<br>(4/912)           | 2.13 (0.80–5.06)<br>(6/912)             | 2.95 (1.27–6.88)<br>(9/912)             | 2.02 (1.51–2.71)<br>(62/912)             |
| Pregabalin                    | 1.98 (0.53–7.47)<br>(3/1,074)           | 1.81 (0.68–4.81)<br>(6/1,074)           | 1.95 (0.78–4.87)<br>(7/1,074)           | 1.77 (1.33–2.37)<br>(64/1,074)           |
| GP/PG <sup>e</sup>            | 2.49 (0.91–6.87)<br>(7/1,986)           | 1.96 (0.88–4.35)<br>(12/1,986)          | 2.41 (1.11–5.00)<br>(16/1,986)          | 1.89 (1.49–2.39)<br>(126/1,986)          |

<sup>a</sup> OAC+AA: Patients who started treatment with an oral anticoagulant plus an antiarrhythmic drug, in the three months after treatment initiation with the study drug.

<sup>b</sup> OAC/APA+AA: Patients who started treatment with an oral anticoagulant or an antiplatelet agent plus an antiarrhythmic drug, in the three months after treatment initiation with the study drug.

<sup>c</sup> AA: Patients who started treatment with an antiarrhythmic drug, in the three months after treatment initiation with the study drug.

<sup>d</sup> OAC: Patients who started treatment with an oral anticoagulant, in the three months after treatment initiation with the study drug.

<sup>e</sup> GP/PG: gabapentin or pregabalin.

<sup>f</sup> AL/DZ: alprazolam or diazepam.
